# Supplementary material for: Surface Functionalization of Activated Carbon Cloth for Wastewater Perchlorate Adsorption-Integrated Molecular Modeling and Experimental Energy Analysis
Source: Hindawi journal article supplement (doi:10.1155/2023/5529837), 2023-12-08
Supplement: f1 [file 5529837.f1.docx]

**Supplementary Materials**

**Surface functionalization of activated carbon cloth for wastewater perchlorate adsorption-Integrated molecular modelling and experimental energy analysis**

Wei-Fan Kuan a,b,c,d, Muhammad Sheraz Ahmad e, Chia-Hsun Hsieh b, Prakash Bhuyar f, Tsing-Hai Wang g, Shu-Ching Ou h*, Ching-Lung Chen c, e, i*

a Department of Chemical and Materials Engineering, Chang Gung University, Taoyuan, 33302, Taiwan

b Division of Hematology-Oncology, Department of Internal Medicine, New Taipei Municipal Tucheng Hospital (Built and Operated by Chang Gung Medical Foundation), New Taipei City, 23600, Taiwan

c Center for Sustainability and Energy Technologies, Chang Gung University, Taoyuan, 33302, Taiwan

d College of Environment and Resources, Ming Chi University of Technology, New Taipei City 24301, Taiwan

e Center for Environmental Sustainability and Human Health, Ming Chi University of Technology, New Taipei City, 24301, Taiwan

f School of Renewable Energy, Maejo University, Chiang Mai 50290, Thailand

g Department of Chemical Engineering and Materials Science, Yuan Ze University, Chongli 320, Taiwan

h Department of Chemistry & Biochemistry, University of Delaware, Newark, DE, 19713, USA

i Department of Safety, Health and Environmental Engineering, Ming Chi University of Technology, New Taipei City, 24301, Taiwan

* Corresponding author:

Shu-Ching Ou: ousc@udel.edu; Ching-Lung Chen: [tommy@mail.mcut.edu.tw](mailto:tommy@mail.mcut.edu.tw)


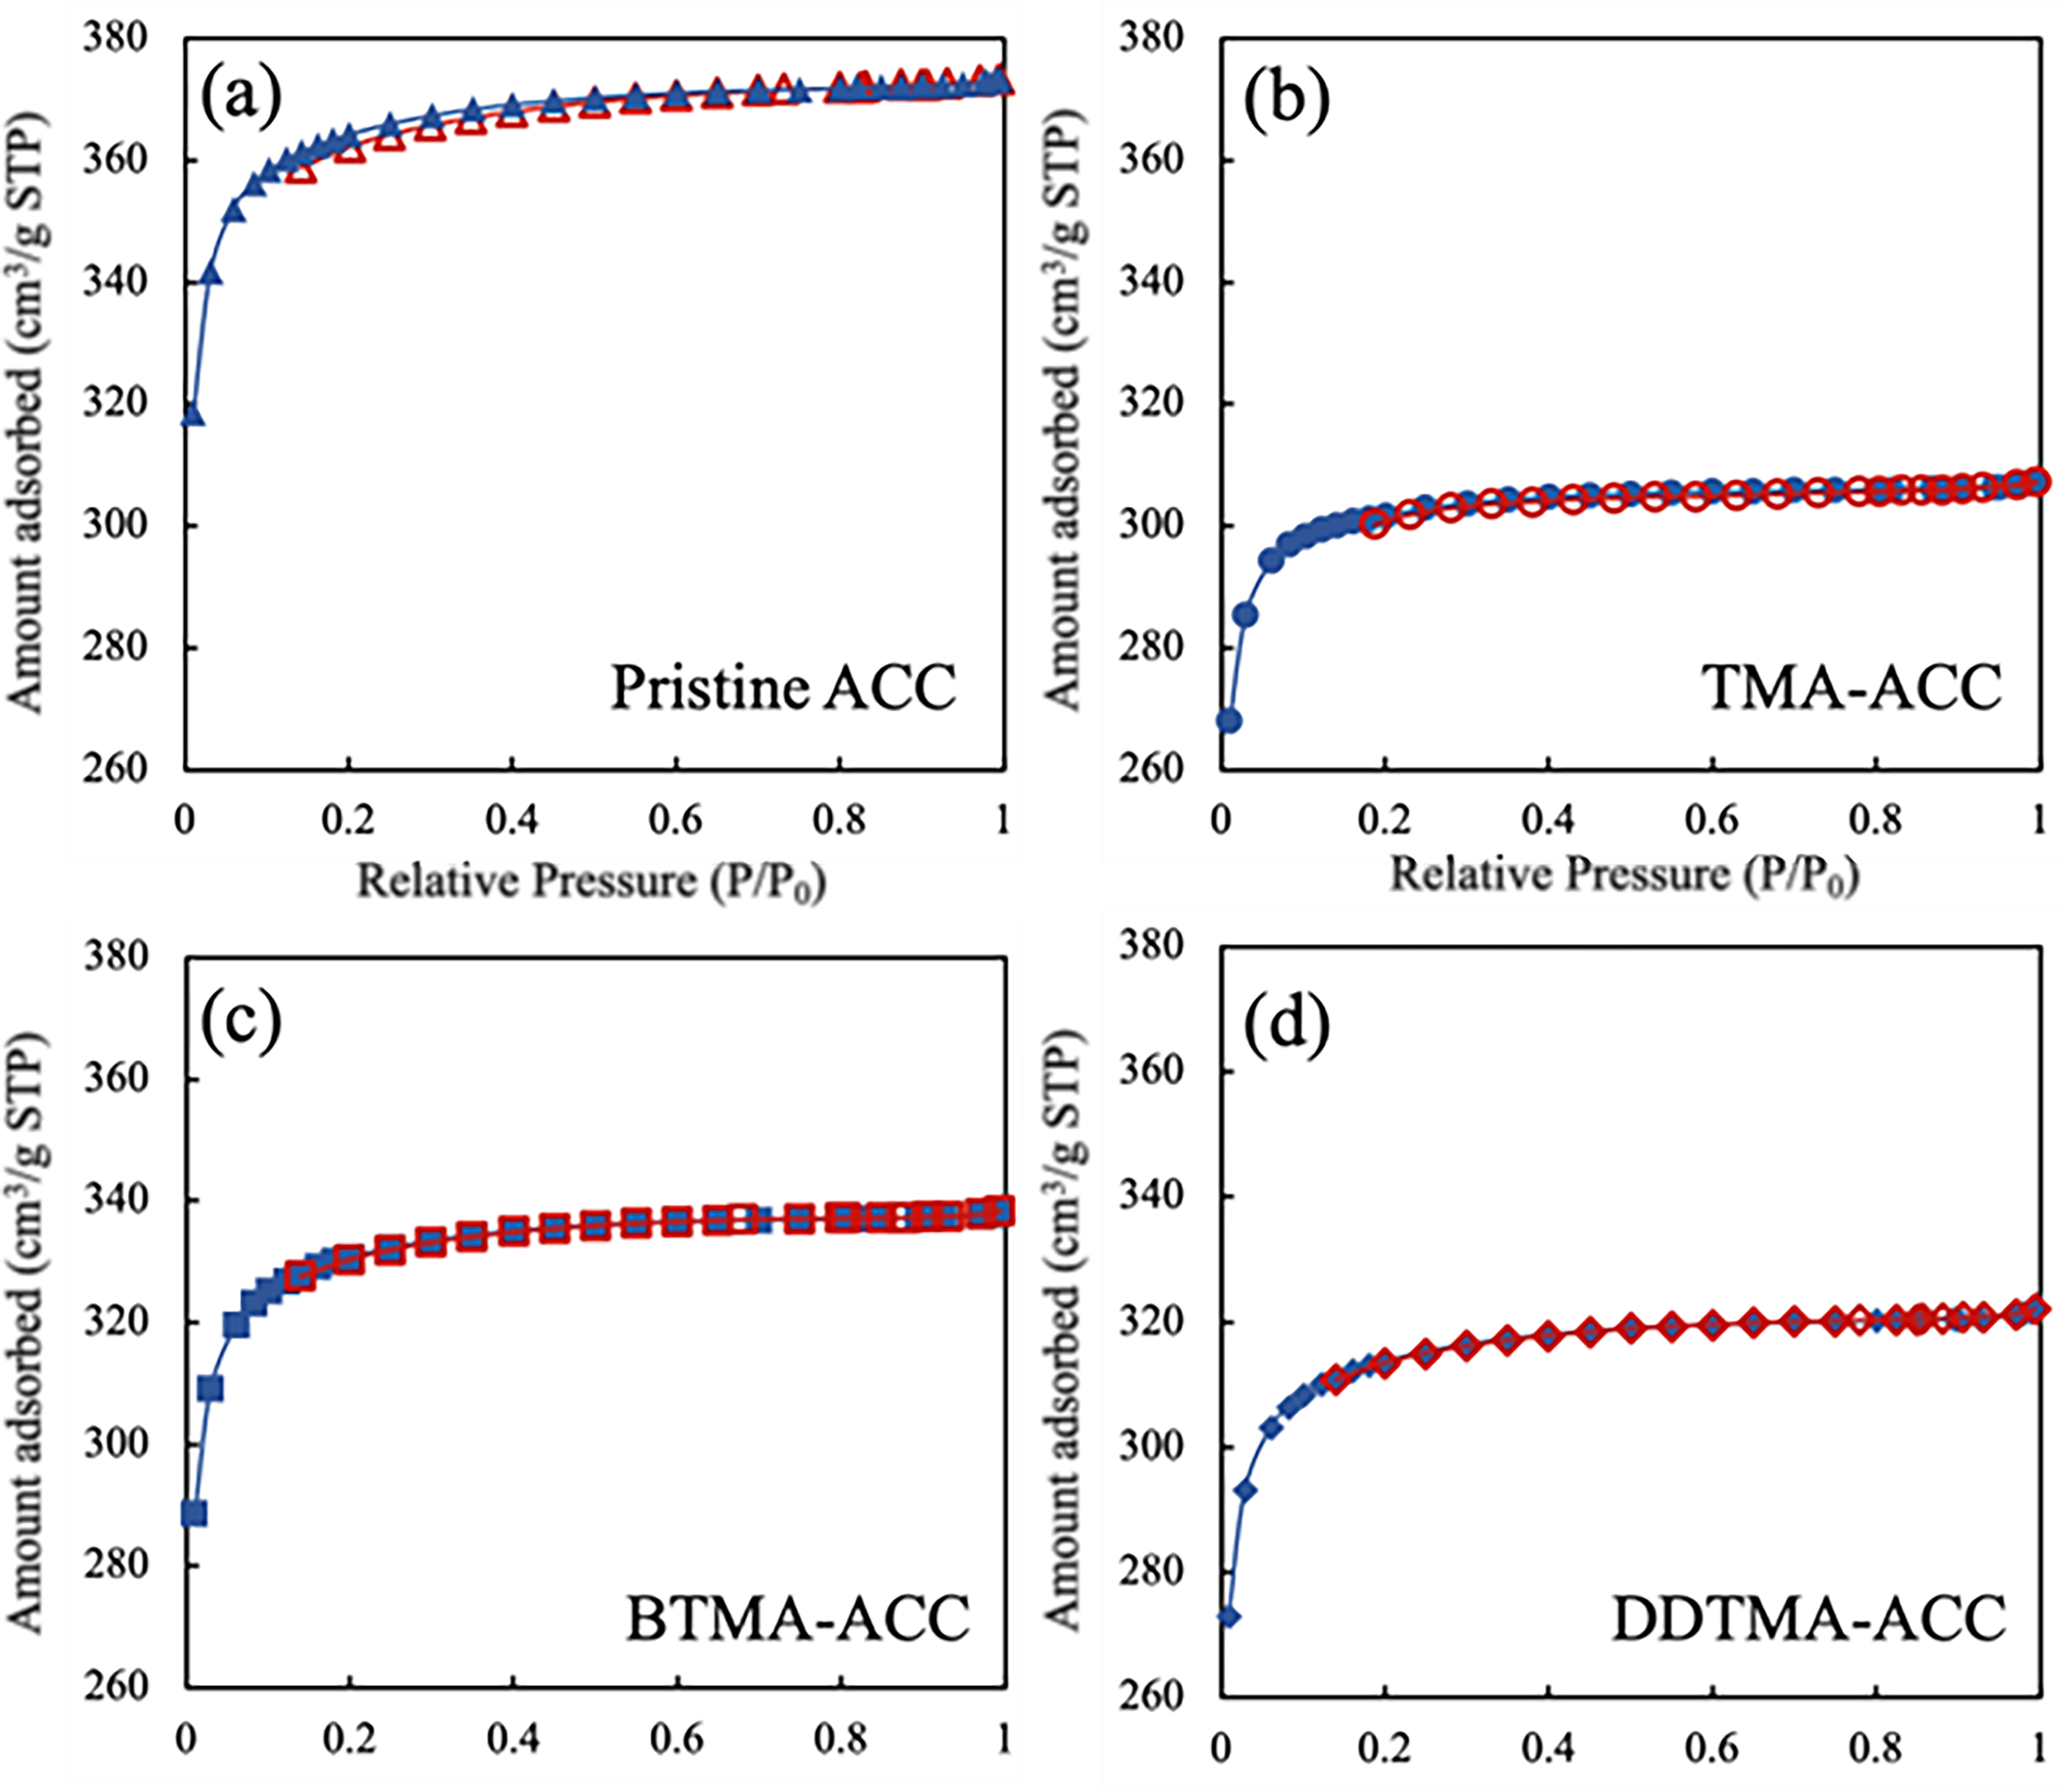


Fig. S1**.** Nitrogen adsorption–desorption isotherms of various adsorbents. (a) pristine ACC; (b)TMA-ACC; (c)BTMA-ACC; (d) DDTMA-ACC. The surfactant loading is fixed ca. 0.4 mmol/g. Blue color represents the adsorption isotherms while red color indicates the desorption isotherms.


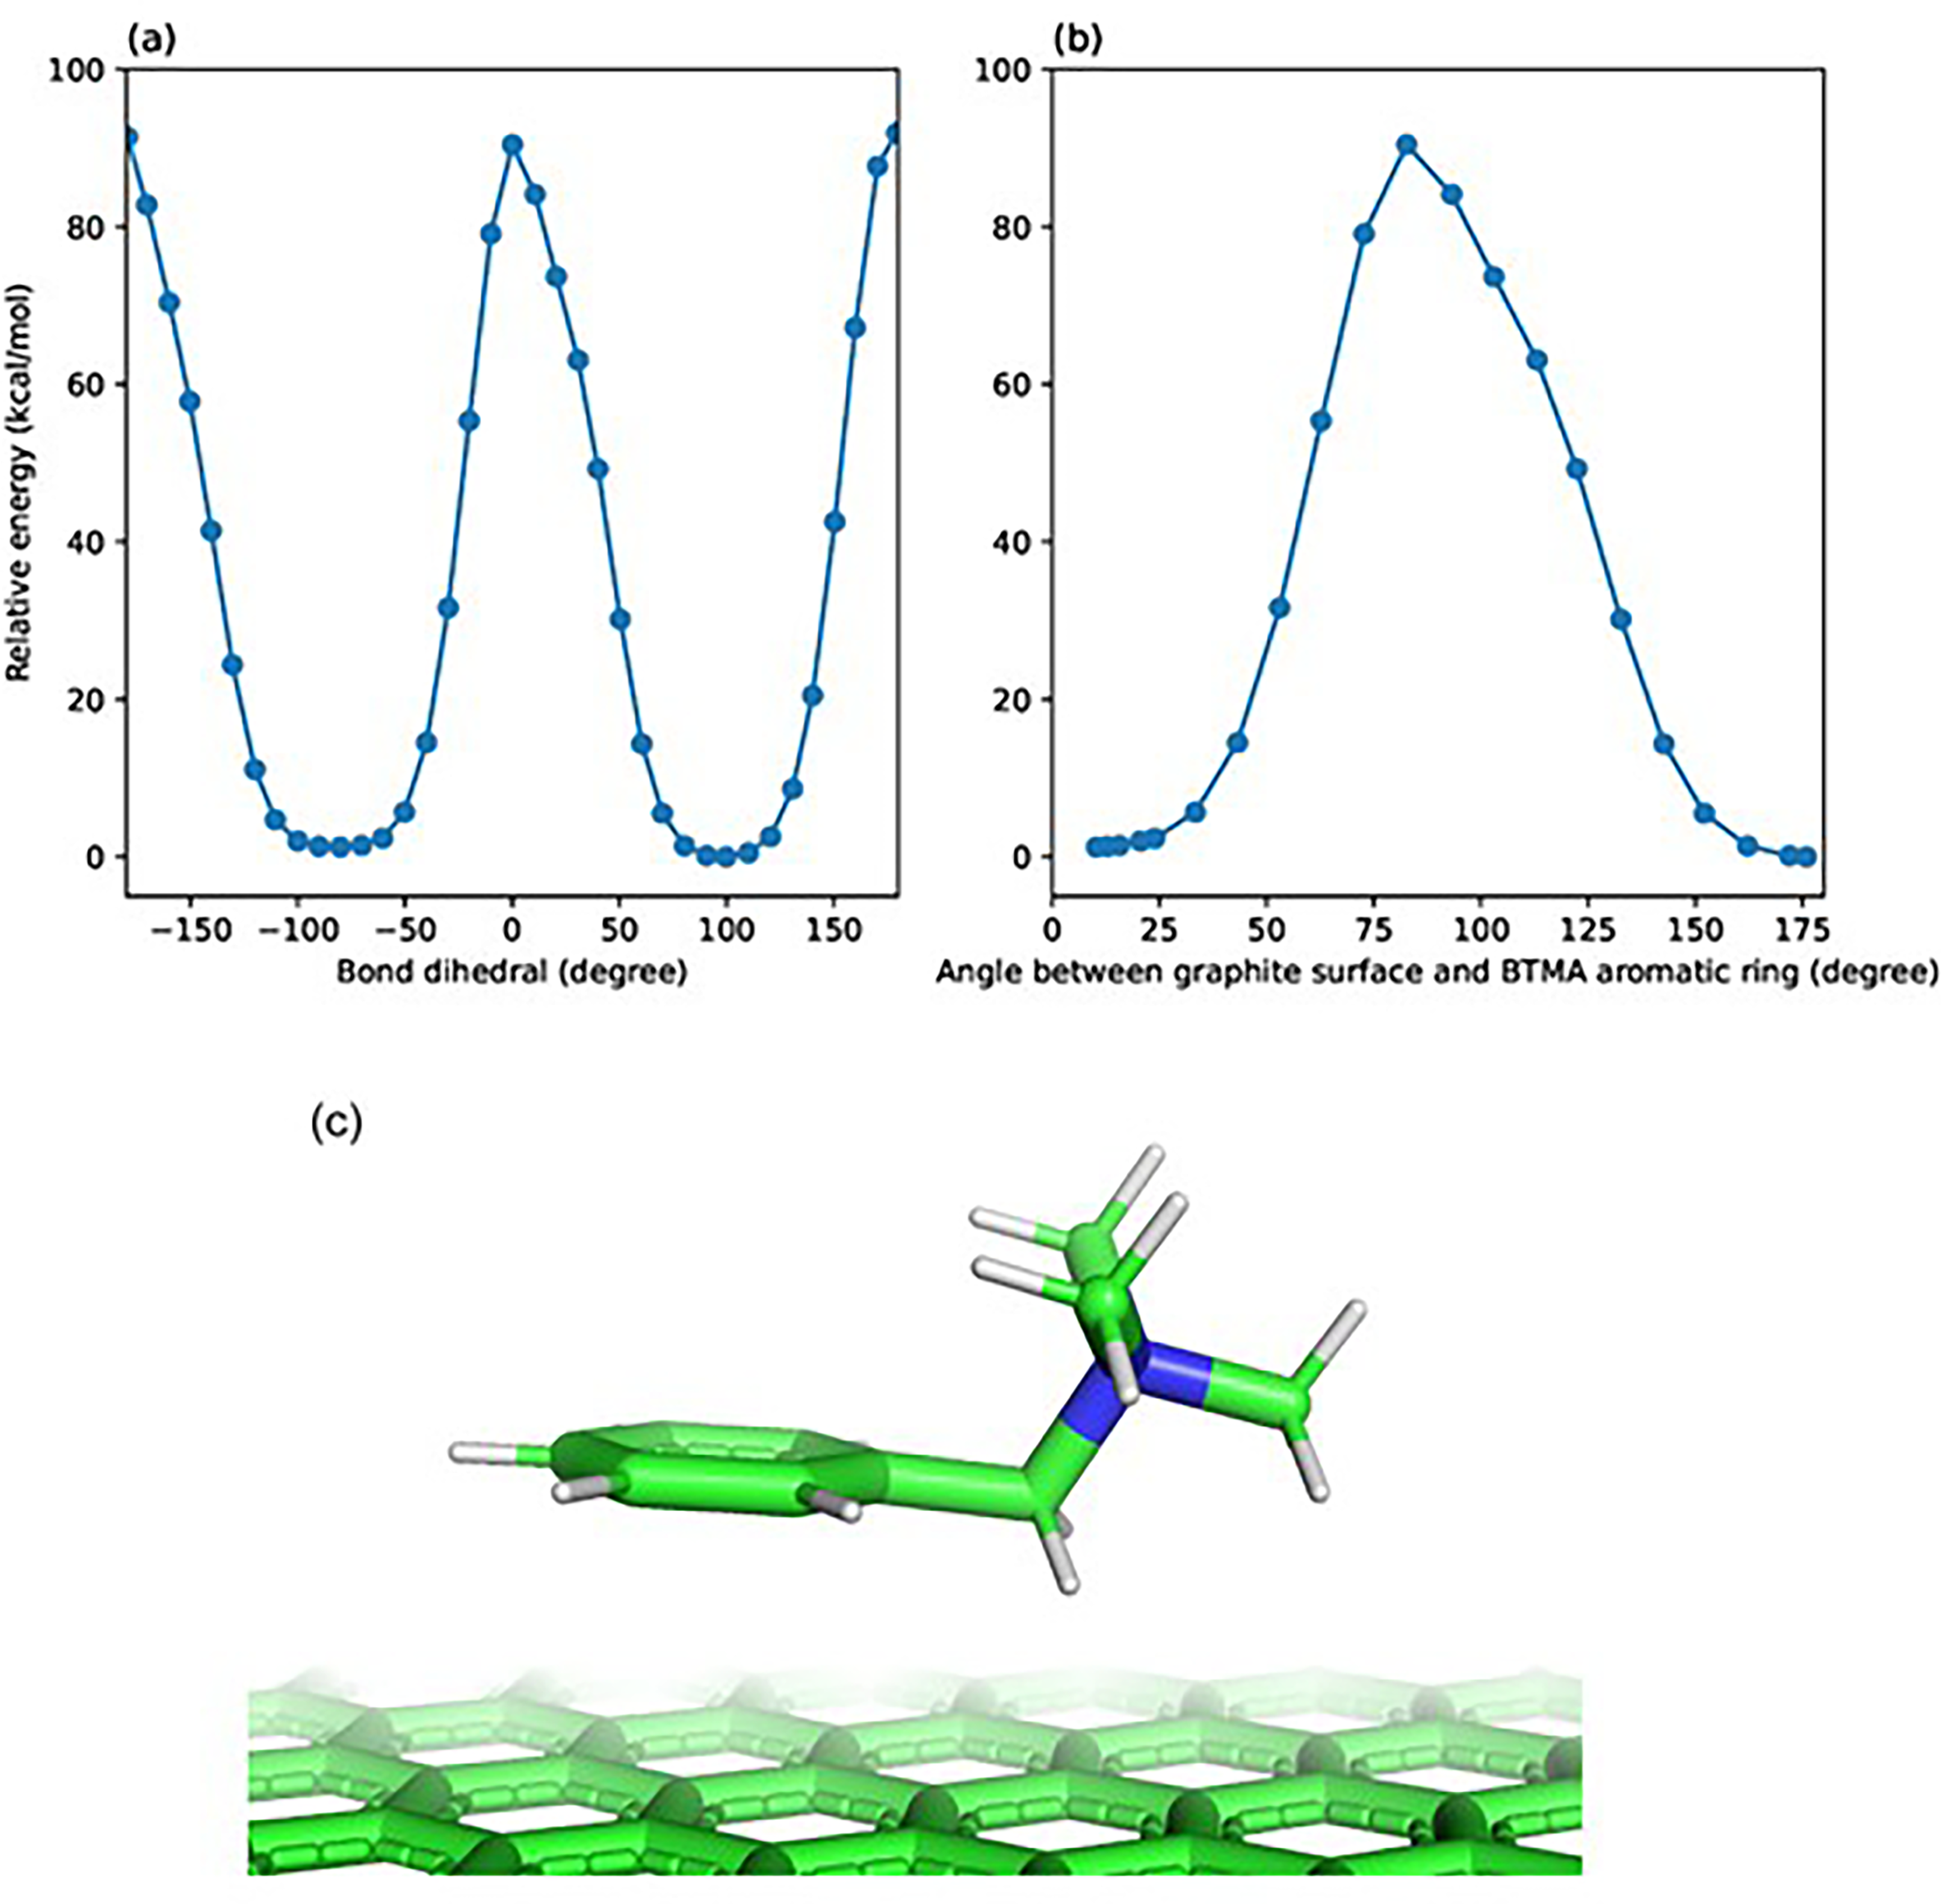


Fig. S2: Relative energy profile for different orientation between BTMA and graphite surface, (a) as a function of bond dihedral angle of CH2 - aromatic ring, or (b) as a function of the angle between BTMA aromatic ring and graphite surface. (c) The lowest energy pose of BTMA with graphite surface, the aromatic ring is nearly parallel to the surface.


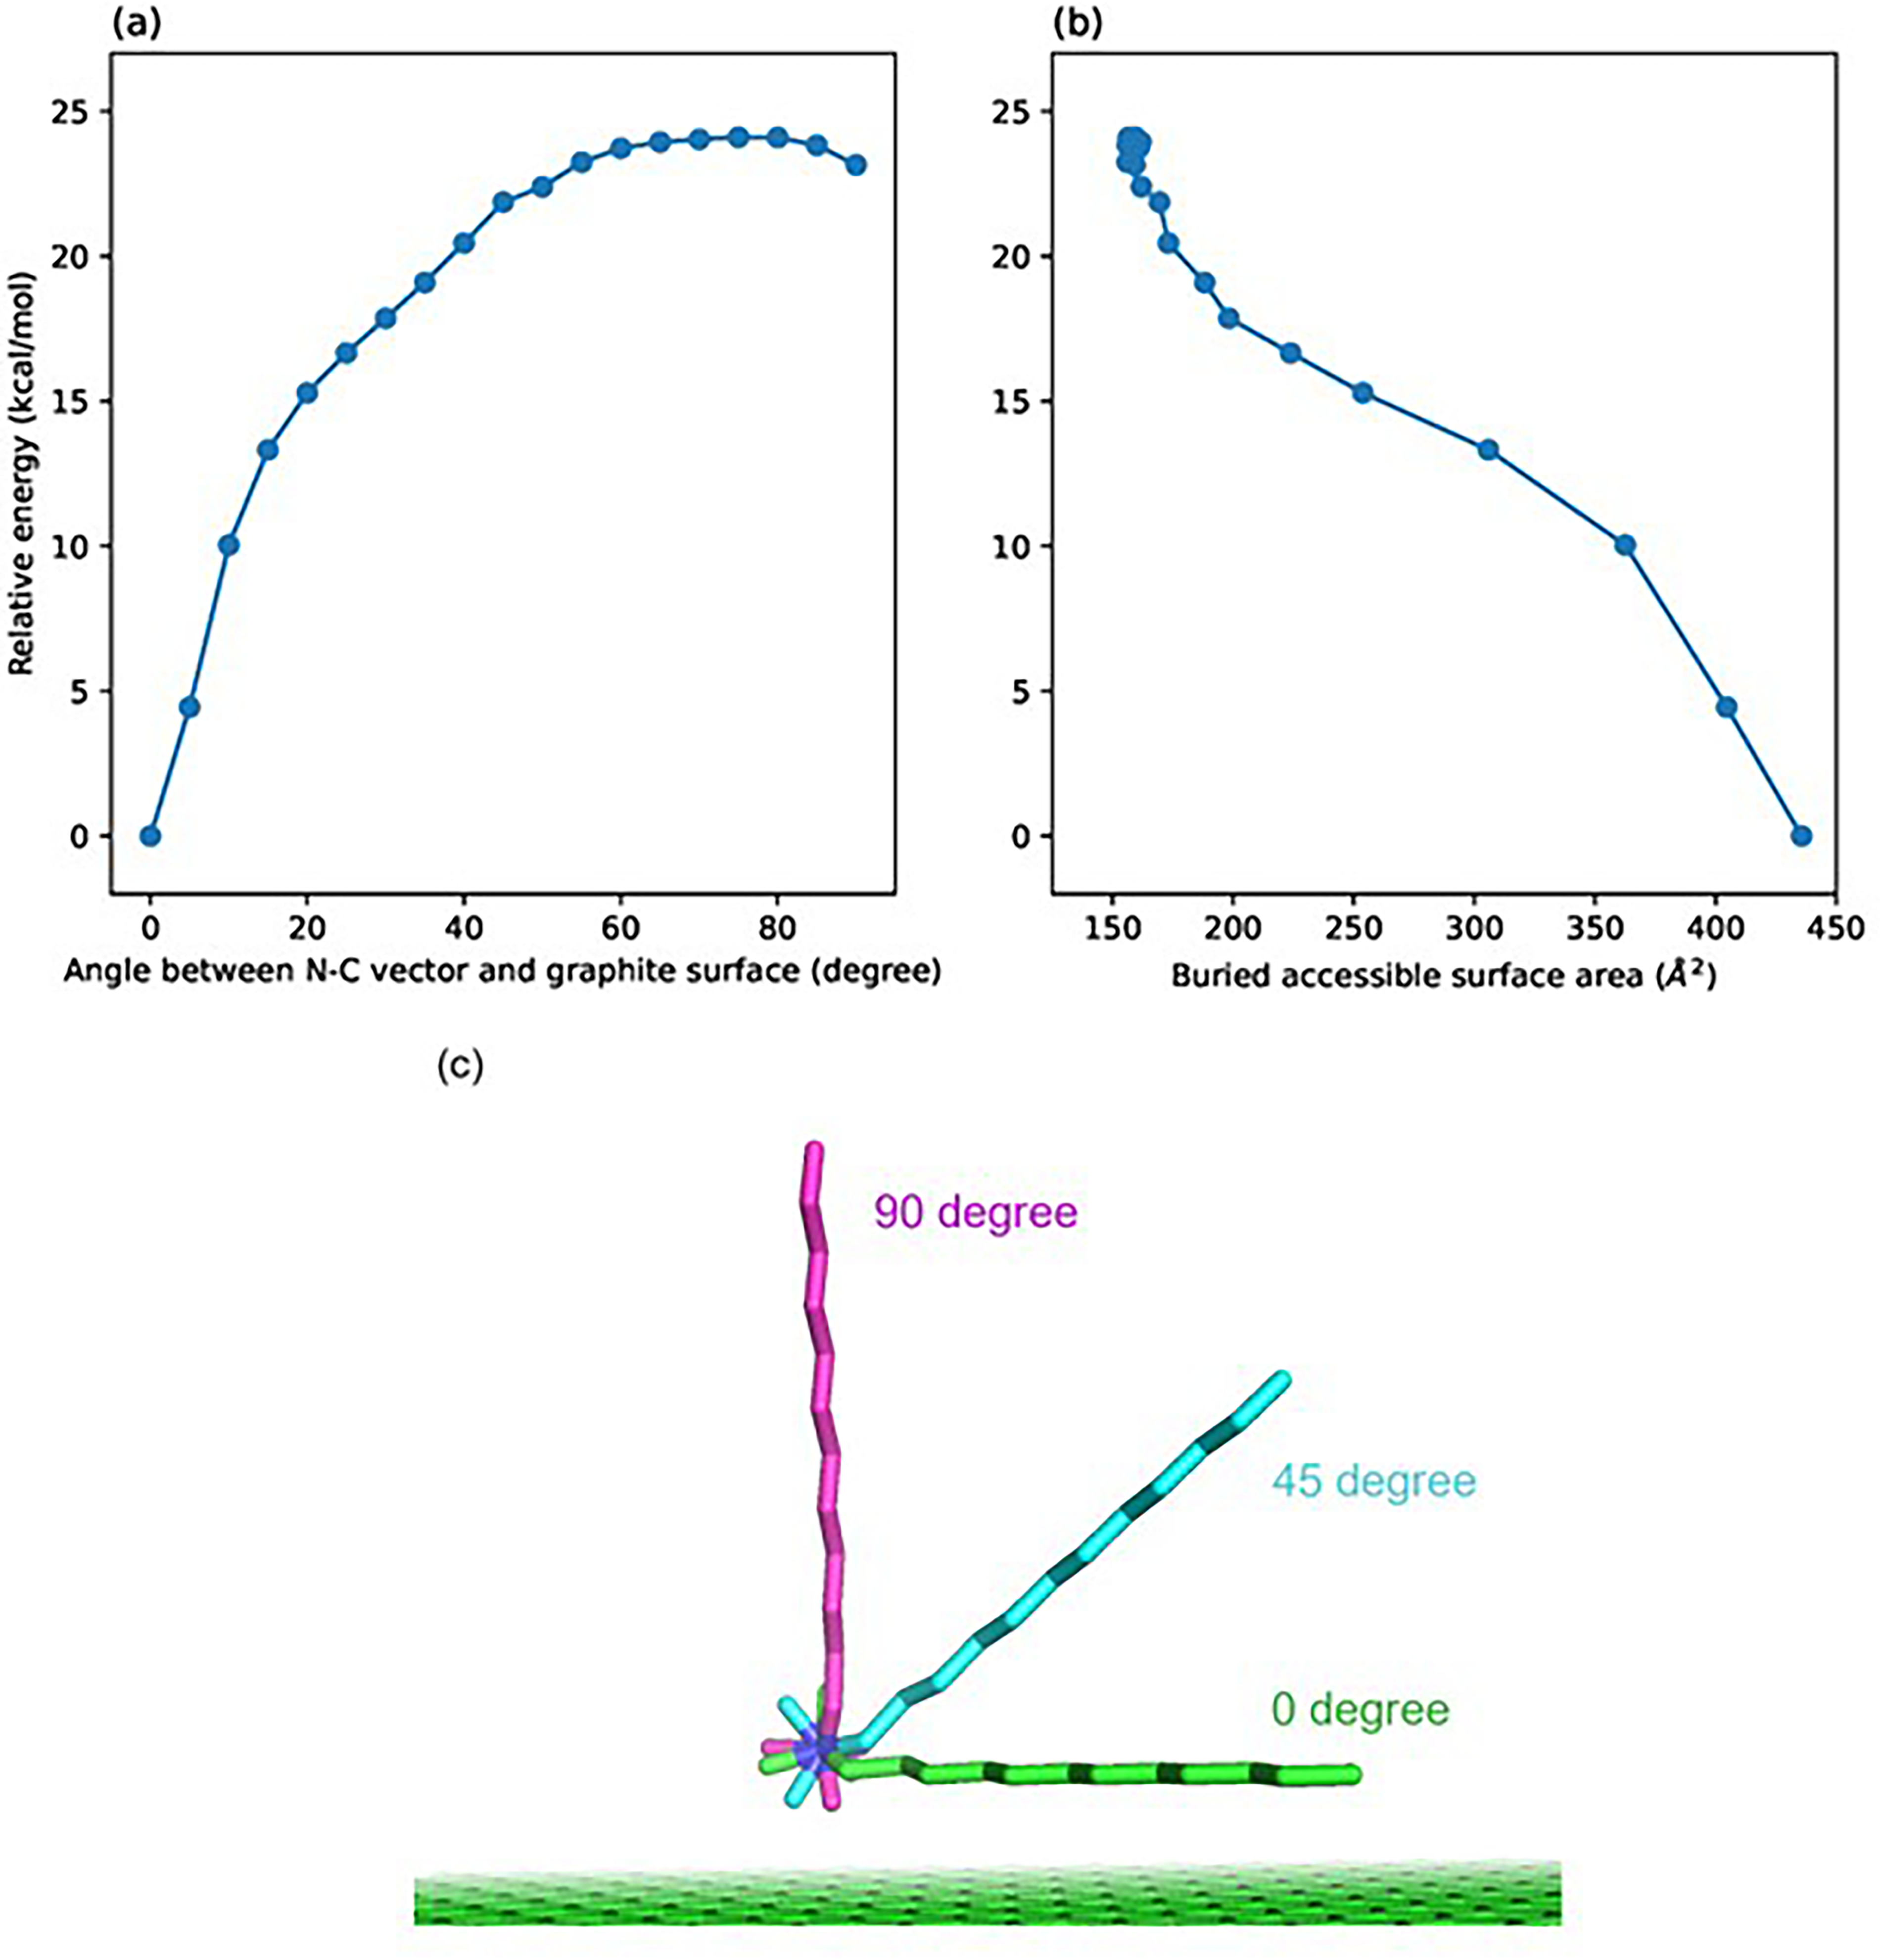


Fig. S3: Relative energy profile for different orientation of DDTMA, (a) as a function of the angle between nitrogen and the terminal CH3 atom, or (b) as a function of the buried surface area between DDTMA at different angles and graphite surface. (c) Representative angles between DDTMA and the graphite surface, with blue color representing the nitrogen atom (which is also the rotational origin) in DDTMA. Hydrogen atoms are not shown for visual clarity.

Table S1: Calculated adsorption energies to graphite using CGenFF force field, DFT, and semiempirical GFN2-xTB methods. All values are in kcal/mol. Values for CGenFF and ωB97X-D are obtained from literature [1]. Experimental values are from multiple temperature programmed desorption (TPD) measurements in ultra-high vacuum [2, 3].

| Molecule | CGenFF | ωB97X-D | GFN2-xTB | Experimental |
| --- | --- | --- | --- | --- |
| Methane | -3.05 | -3.63 | -3.57 | -3.37 |
| Ethane | -4.88 | -5.68 | -4.85 | -5.88 |
| Butane | -8.78 | -10.77 | -8.95 | -9.75 |
| Benzene | -10.40 | -11.35 | -11.92 | -11.52 ± 1.92 |
| Naphthalene | -16.43 | –18.47 | -18.32 | -18.48 ± 2.16 |
| O-dichlorobenzene | -14.67 | -14.82 | -16.57 | -16.56 ± 1.44 |
| Methanol | -4.51 | -4.53 | -4.14 | -11.52 ± 0.72 |
| 1,1-dichloroethane | -8.51 | -6.60 | -4.01 | -12.24 ± 0.72 |
| Water | - | -2.31 | -2.02 | -11.04 ± 0.72 |
| Ammonia | -1.91 | -3.10 | -2.03 | -6.00 ± 0.48 |

# References:

1. Conti, S. and M. Cecchini, *Accurate and efficient calculation of the desorption energy of small molecules from graphene.* The Journal of Physical Chemistry C, 2015. **119**(4): p. 1867-1879.

2. Ulbricht, H., et al., *Thermal desorption of gases and solvents from graphite and carbon nanotube surfaces.* Carbon, 2006. **44**(14): p. 2931-2942.

3. Tait, S.L., et al., *n-alkanes on Pt (111) and on C (0001)∕ Pt (111): Chain length dependence of kinetic desorption parameters.* The Journal of Chemical Physics, 2006. **125**(23).
